# Supplementary material for: Validation of the CrIS Fast Physical NH 3 Retrieval with ground-based FTIR
Source: Copernicus journal article supplement (doi:10.5194/amt-2017-38), 2017-03-21
Supplement: Supplementary file [file amt-2017-38-AC2-supplement.pdf]

**Table R1.** Results of the total column comparisons of the FTIR to CrIS for observations with a  $\text{DOF} < 0.9$ . N is the number of averaged total columns, MD is the mean difference [ $10^{15}$  molecules  $\text{cm}^{-2}$ ], MRD is the mean relative difference [frac, in %]. Value for the complete set used in Table 3 and Fig 4 are given in red. Take note that the combined value N does not add up with all the separate sites as observations have been included for FTIR total columns  $> 5 \times 10^{15}$  molecules  $\text{cm}^{-2}$ .

| Retrieval | Column range<br>total in<br>molecules $\text{cm}^{-2}$ | N   | MD in<br>$10^{15}$ ( $1\sigma$ ) | MRD in % ( $1\sigma$ ) | FTIR mean in $10^{15}$ ( $1\sigma$ ) |
|-----------|--------------------------------------------------------|-----|----------------------------------|------------------------|--------------------------------------|
| CrIS-NH3  | $< 10.0 \times 10^{15}$                                | 39  | 2.6 (4.1)                        | 33.0 (54.9)            | 6.1 (2.2)                            |
| CrIS-NH3  | $\geq 10.0 \times 10^{15}$                             | 6   | -4.3 (4.4)                       | -41.6 (44.3)           | 14.2 (4.3)                           |
| CrIS-NH3  | $< 10.0 \times 10^{15}$                                | 93  | 3.3 (4.1)                        | 30.2 (38.0)            | 7.5 (1.5)                            |
| CrIS-NH3  | $\geq 10.0 \times 10^{15}$                             | 109 | 0.4 (5.3)                        | -1.39 (34.4)           | 16.7 (8.5)                           |
